# Supplementary material for: Transition metal (Ti, Cu, Zn, Pt) single-atom modified graphene/AS2 (A = Mo, W) van der Waals heterostructures for removing airborne pollutants
Source: Royal Society of Chemistry journal article supplement (doi:10.1039/d3cp03269h), 2023-01-01
Supplement: d3cp03269h1.pdf [file d3cp03269h1.pdf]

**Supplementary information of the manuscript: Transition metal (Ti, Cu, Zn, Pt) single-atom modified graphene/AS<sub>2</sub> (A=Mo, W) van der Waals heterostructures for removing airborne pollutants**

Erika Camarillo-Salazar<sup>1</sup>, Reyes Garcia-Diaz<sup>2</sup>, María Teresa Romero de la Cruz<sup>3</sup>, Yuliana Avila-Alvarado<sup>4</sup>, H. N. Fernandez-Escamilla<sup>5</sup>, Gregorio Hernández Cocolletzi<sup>6</sup>, J. Guerrero-Sanchez<sup>7</sup>

<sup>1</sup>Universidad Autónoma de Coahuila, Facultad de Ciencias Químicas, Boulevard Venustiano Carranza e Ing. José Cárdenas, 25280, Saltillo, Coahuila, México.

<sup>2</sup>CONACyT, Universidad Autónoma de Coahuila, Facultad de Ciencias Físico Matemáticas, Unidad Camporredondo, Edif. A, 25000, Saltillo, Coahuila, México.

<sup>3</sup>Universidad Autónoma de Coahuila, Facultad de Ciencias Físico Matemáticas, Unidad Camporredondo, Edif. A 25000, Saltillo, Coahuila, México.

<sup>4</sup>Universidad Autónoma de Coahuila, Facultad de Sistemas, Carretera a México Km 13, 25350 Arteaga, Saltillo, Coahuila, México.

<sup>5</sup>CICFIM Facultad de Ciencias Físico Matemáticas, Universidad Autónoma de Nuevo León, Nuevo Leon, 66450, San Nicolás de los Garza, México

<sup>6</sup>Benemérita Universidad Autónoma de Puebla, Instituto de Física “Ing. Luis Rivera Terrazas”, Apartado Postal J-48, 72570, Puebla, Puebla, México.

<sup>7</sup>Universidad Nacional Autónoma de México, Centro de Nanociencias y Nanotecnología, Apartado 5 Postal 14, 22800, Ensenada, Baja California, México.

## Pollutant molecules adsorption on G/MoS<sub>2</sub> and G/WS<sub>2</sub>

a) NO<sub>2</sub> adsorption on graphene/MoS<sub>2</sub>      d) NO<sub>2</sub> adsorption on graphene/WS<sub>2</sub>

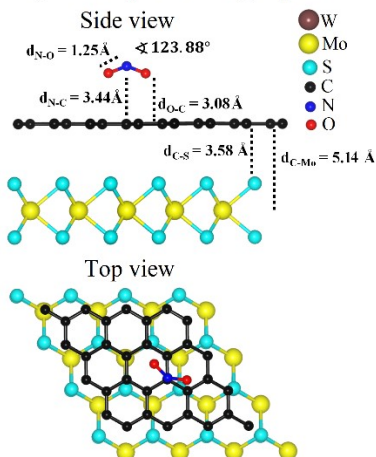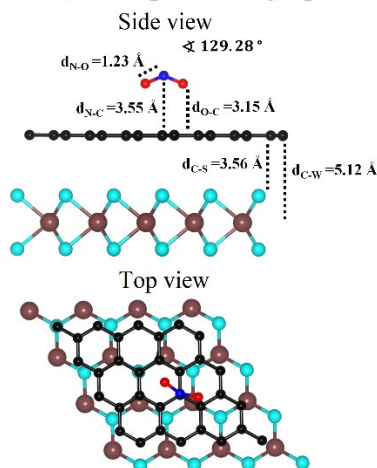

b) SO<sub>2</sub> adsorption on graphene/MoS<sub>2</sub>      e) SO<sub>2</sub> adsorption on graphene/WS<sub>2</sub>

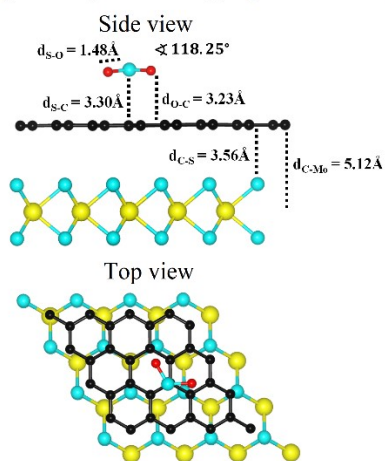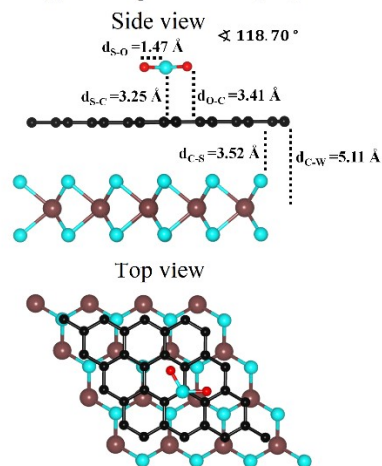

c) CO<sub>2</sub> adsorption on graphene/MoS<sub>2</sub>      f) CO<sub>2</sub> adsorption on graphene/WS<sub>2</sub>

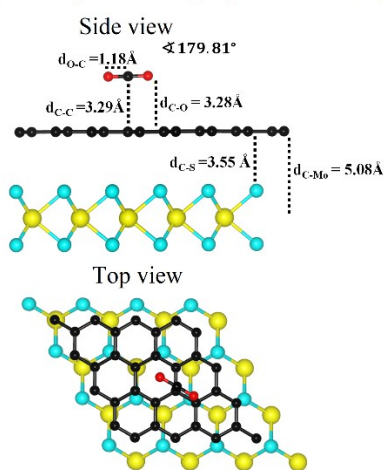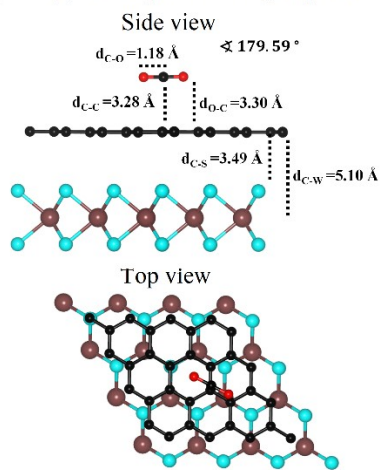

**Fig. S1.** Adsorption of NO<sub>2</sub>, b) SO<sub>2</sub> and c) CO<sub>2</sub> molecules on (a) G/MoS<sub>2</sub> heterostructure and (b) G/WS<sub>2</sub> heterostructure, top and side views.

## Transition metal single-atom G/MoS<sub>2</sub> and G/WS<sub>2</sub>

a) Ti doped graphene on MoS<sub>2</sub>

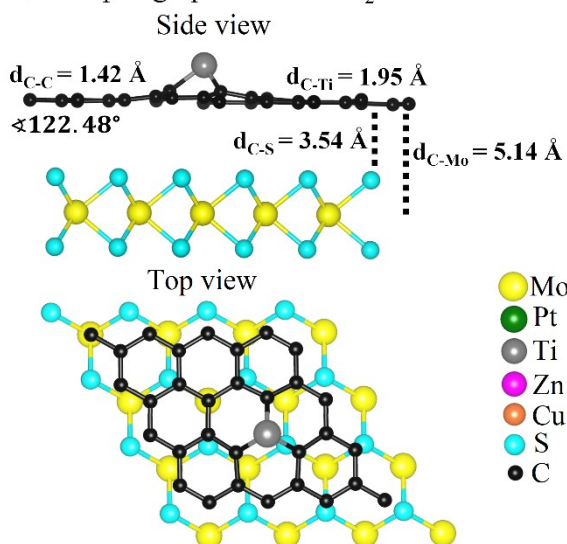

b) Cu doped graphene on MoS<sub>2</sub>

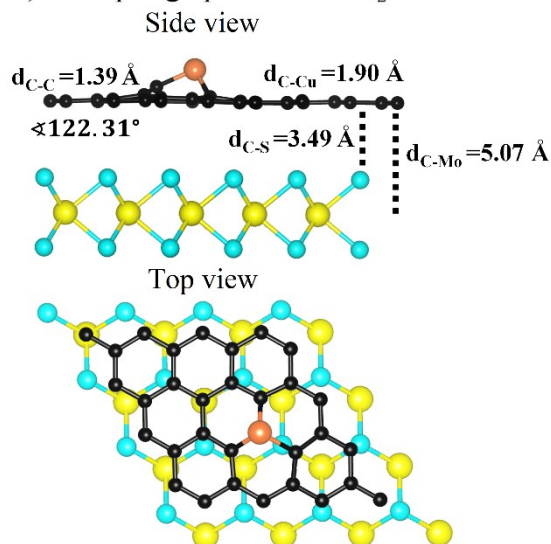

c) Zn doped graphene on MoS<sub>2</sub>

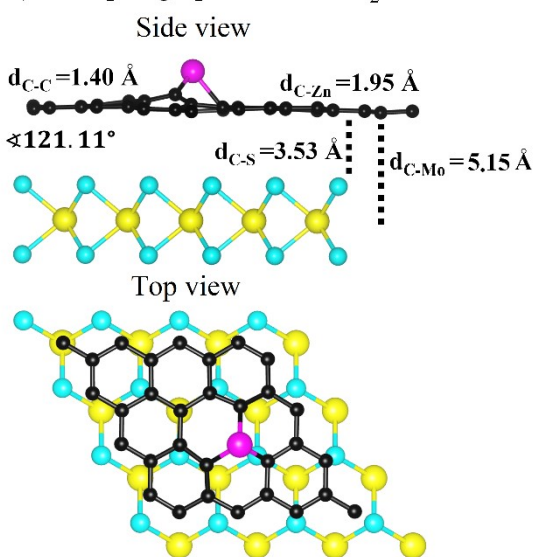

d) Pt doped graphene on MoS<sub>2</sub>

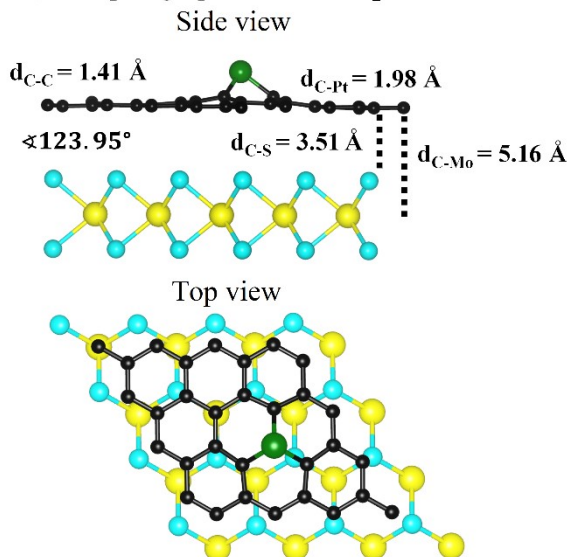

**Fig. S2.** Single-atom graphene, a) Ti, b) Cu, c) Zn, and d) Pt on MoS<sub>2</sub> heterostructure, top and side views.

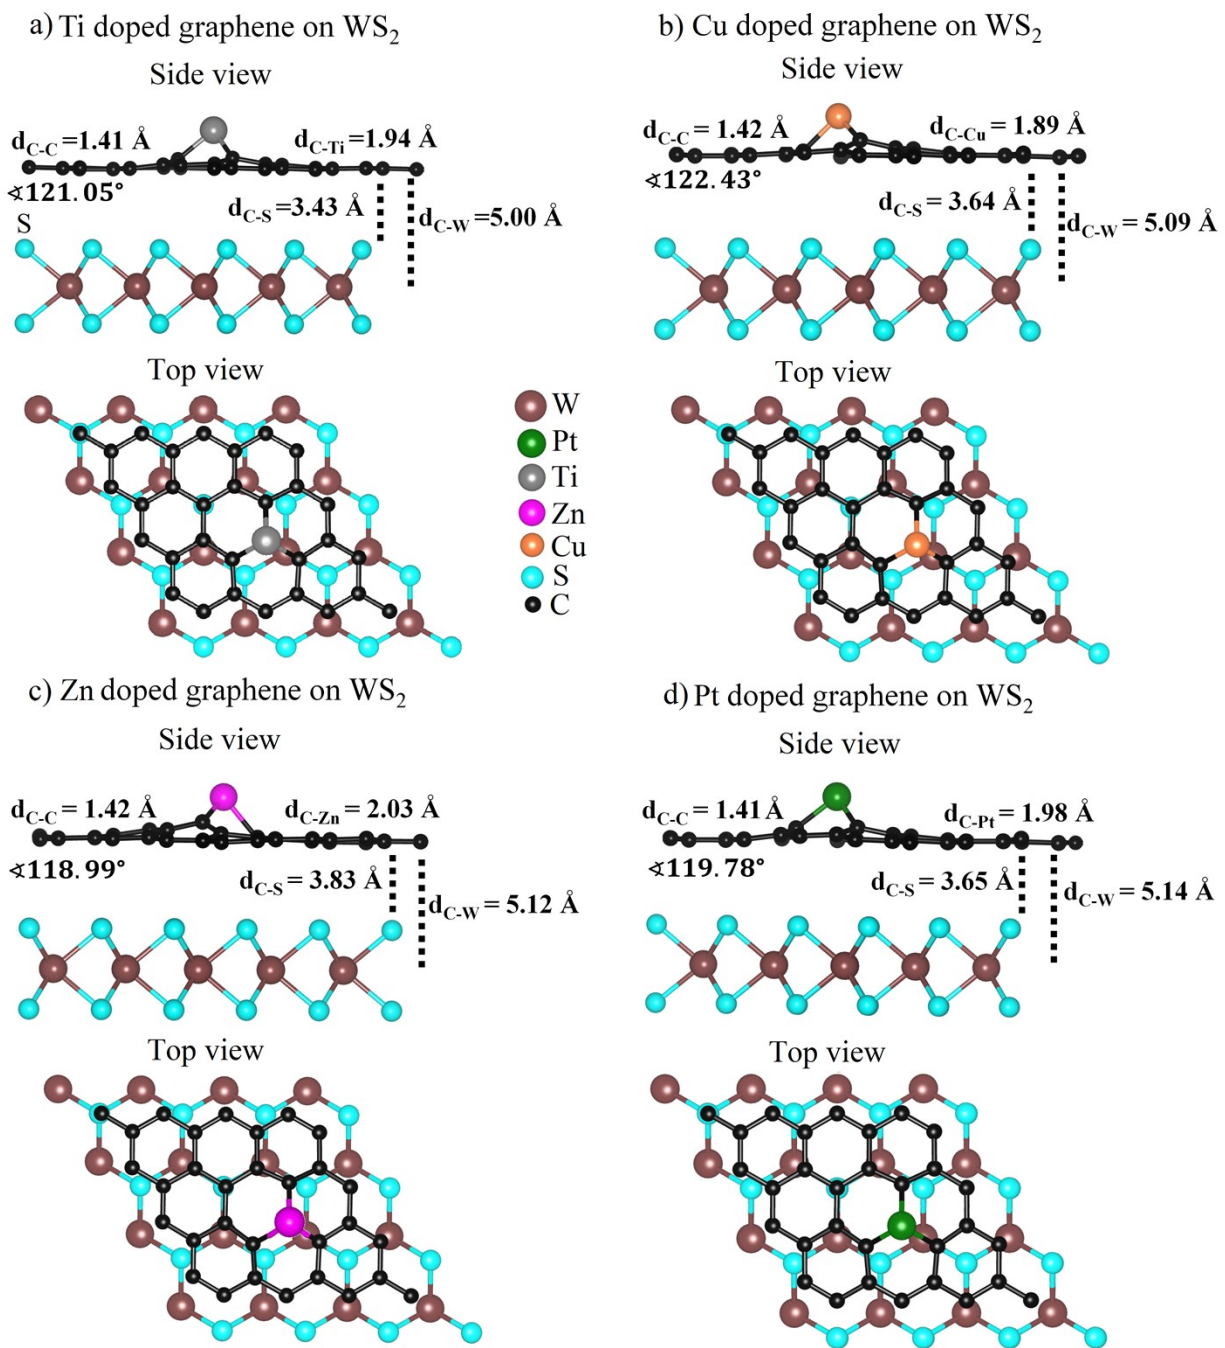

**Fig. S3.** Graphene doped with: a) Ti, b) Cu, c) Zn, and d) Pt on WS<sub>2</sub> heterostructure, top and side views.

## Pollutant molecules adsorption on GSAC/MoS<sub>2</sub> and GSAC/WS<sub>2</sub>

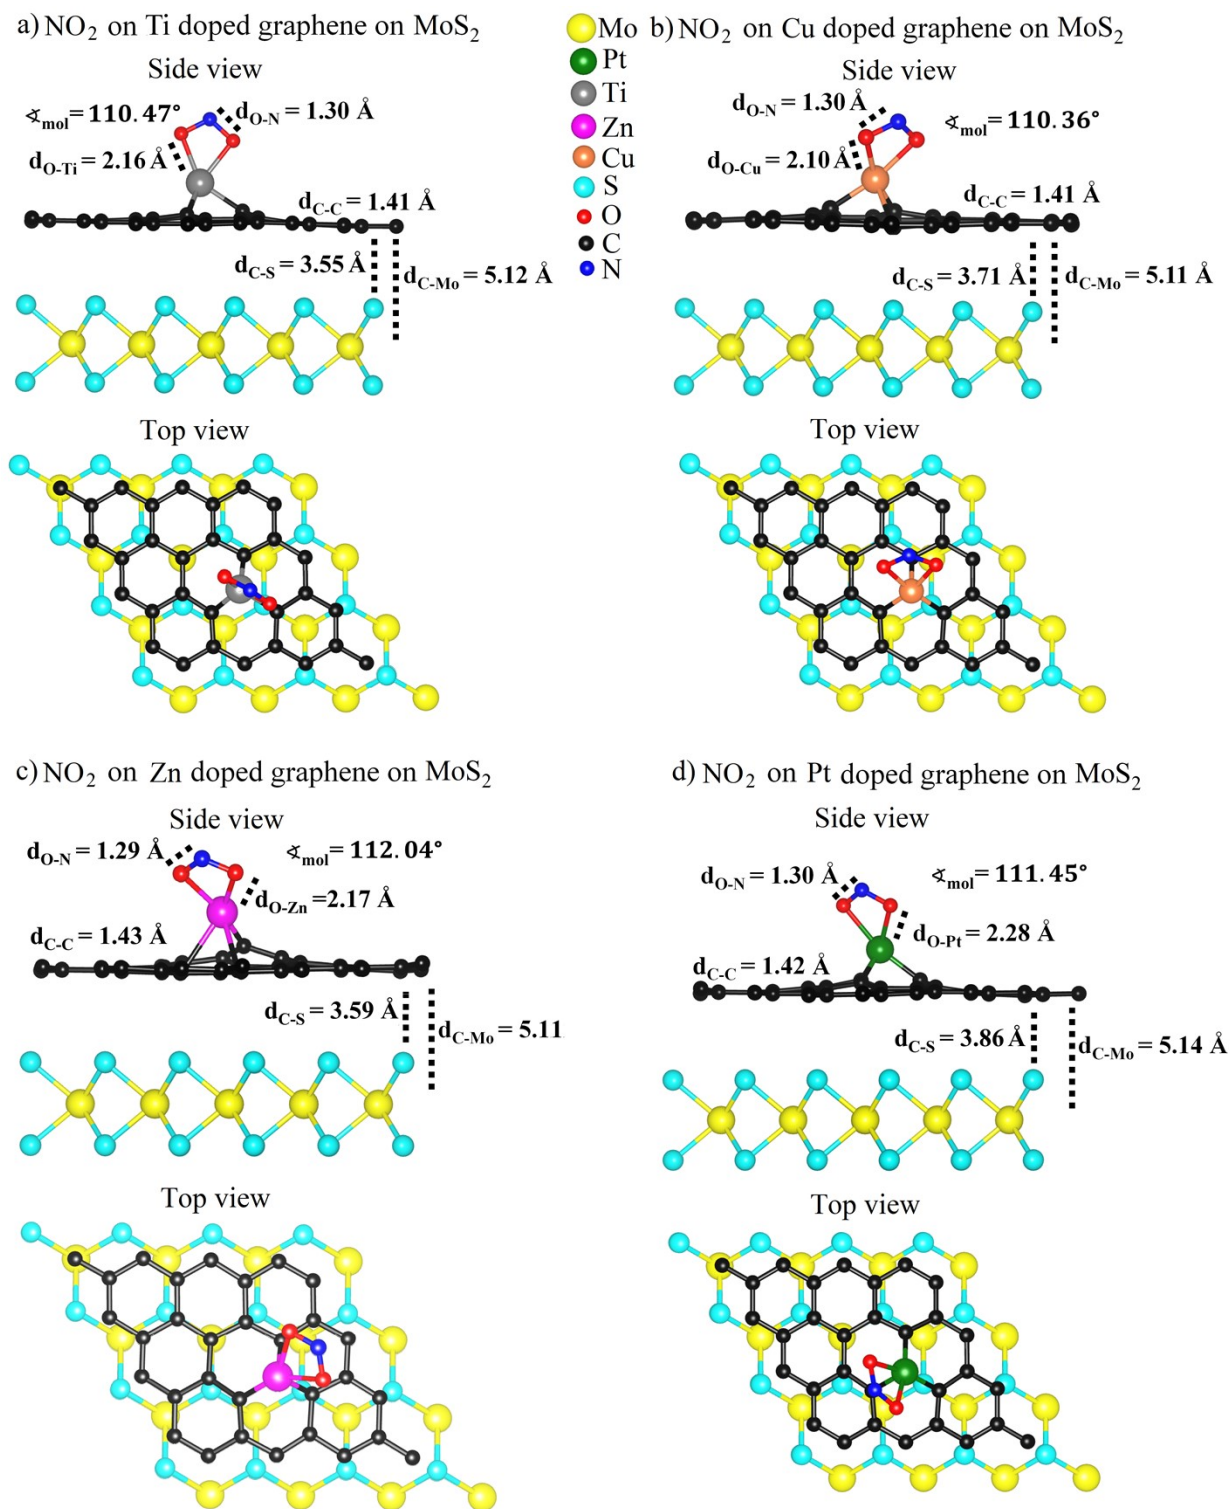

**Fig. S4.** Adsorption of NO<sub>2</sub> molecule on GSAC with a) Ti, b) Cu, c) Zn, and d) Pt on MoS<sub>2</sub> heterostructure, top and side views.

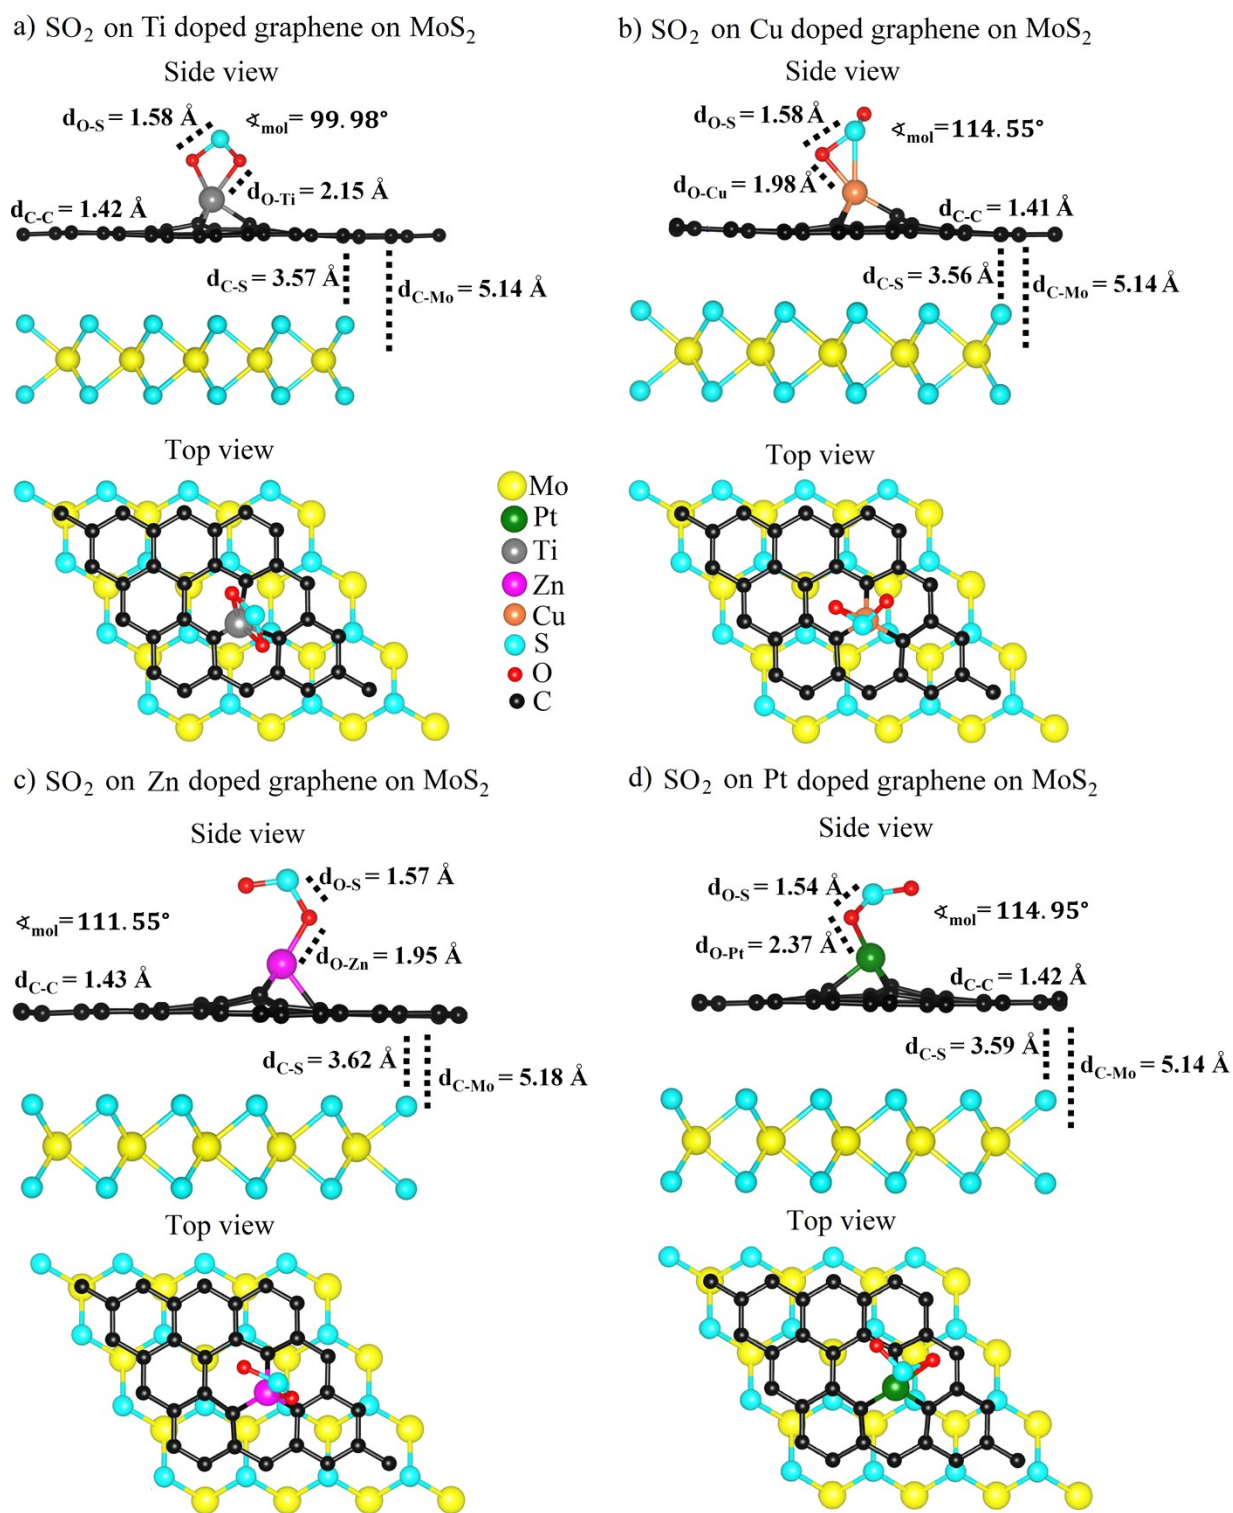

**Fig. S5.** Adsorption of SO<sub>2</sub> molecule on GSAC with: a) Ti, b) Cu, c) Zn, and d) Pt on MoS<sub>2</sub> heterostructure, top and side views.

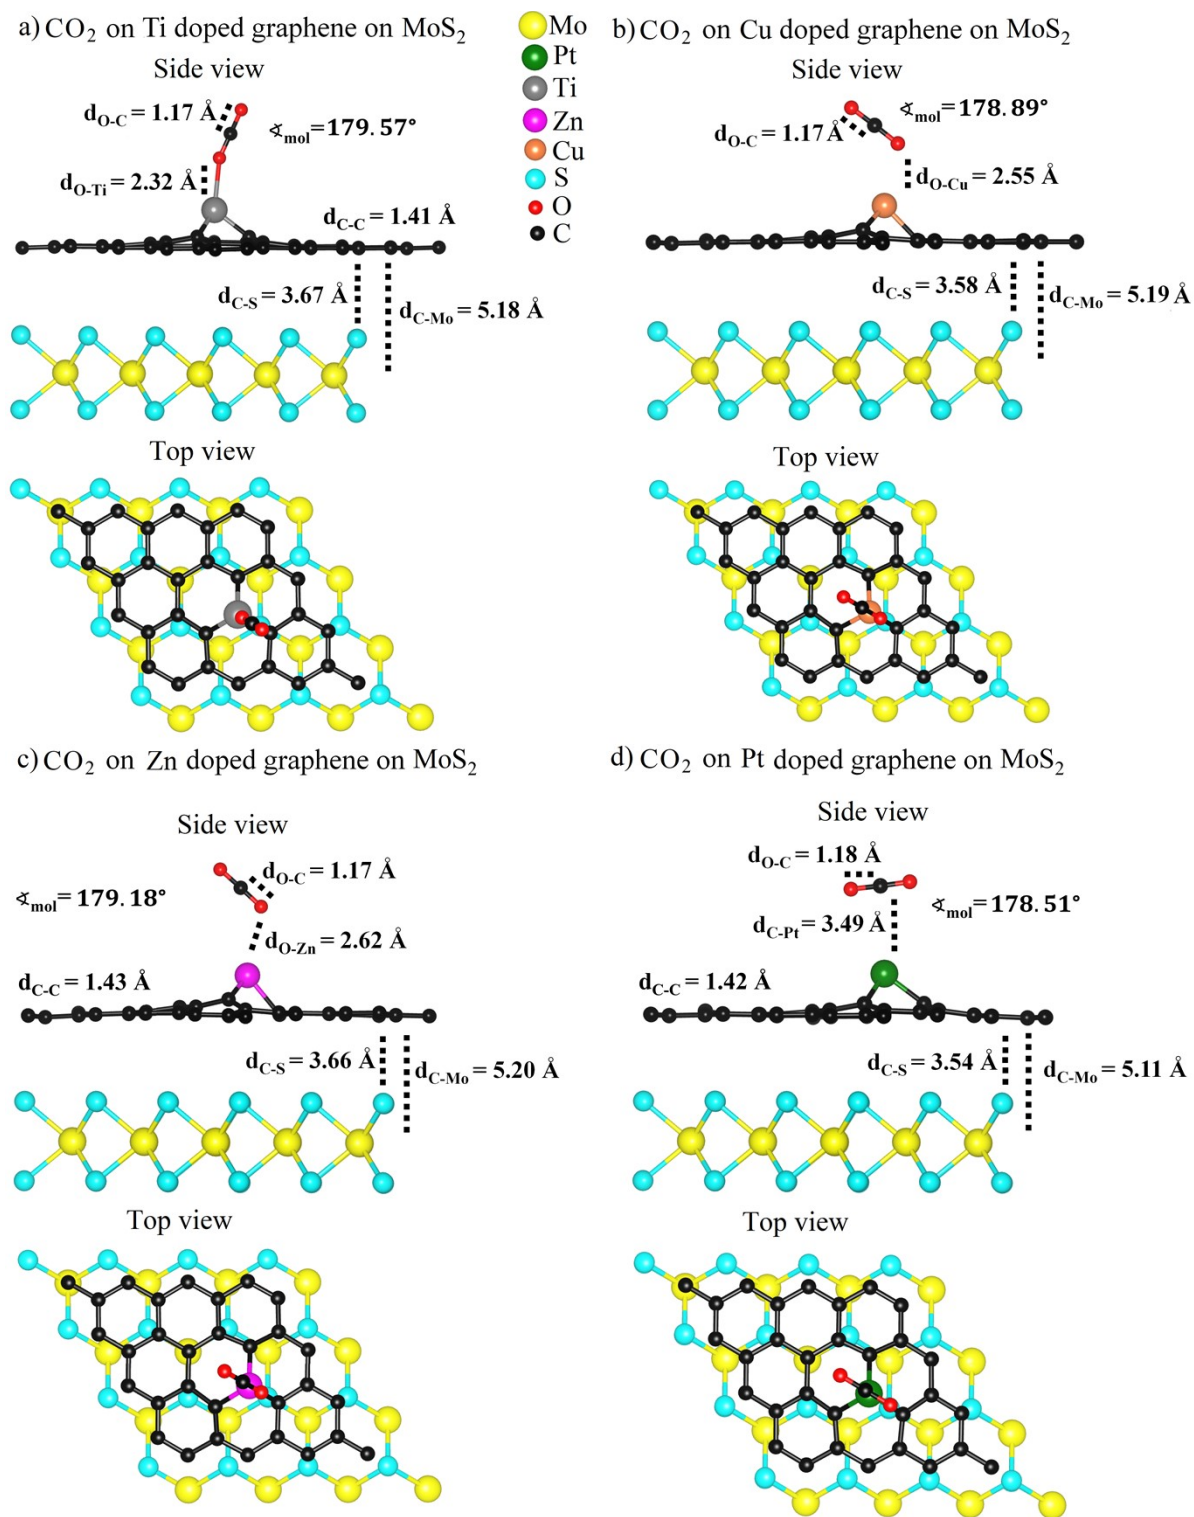

**Fig. S6.** Adsorption of CO<sub>2</sub> molecules on GSAC with: a) Ti, b) Cu, c) Zn, and d) Pt on MoS<sub>2</sub> heterostructure, top and side views.

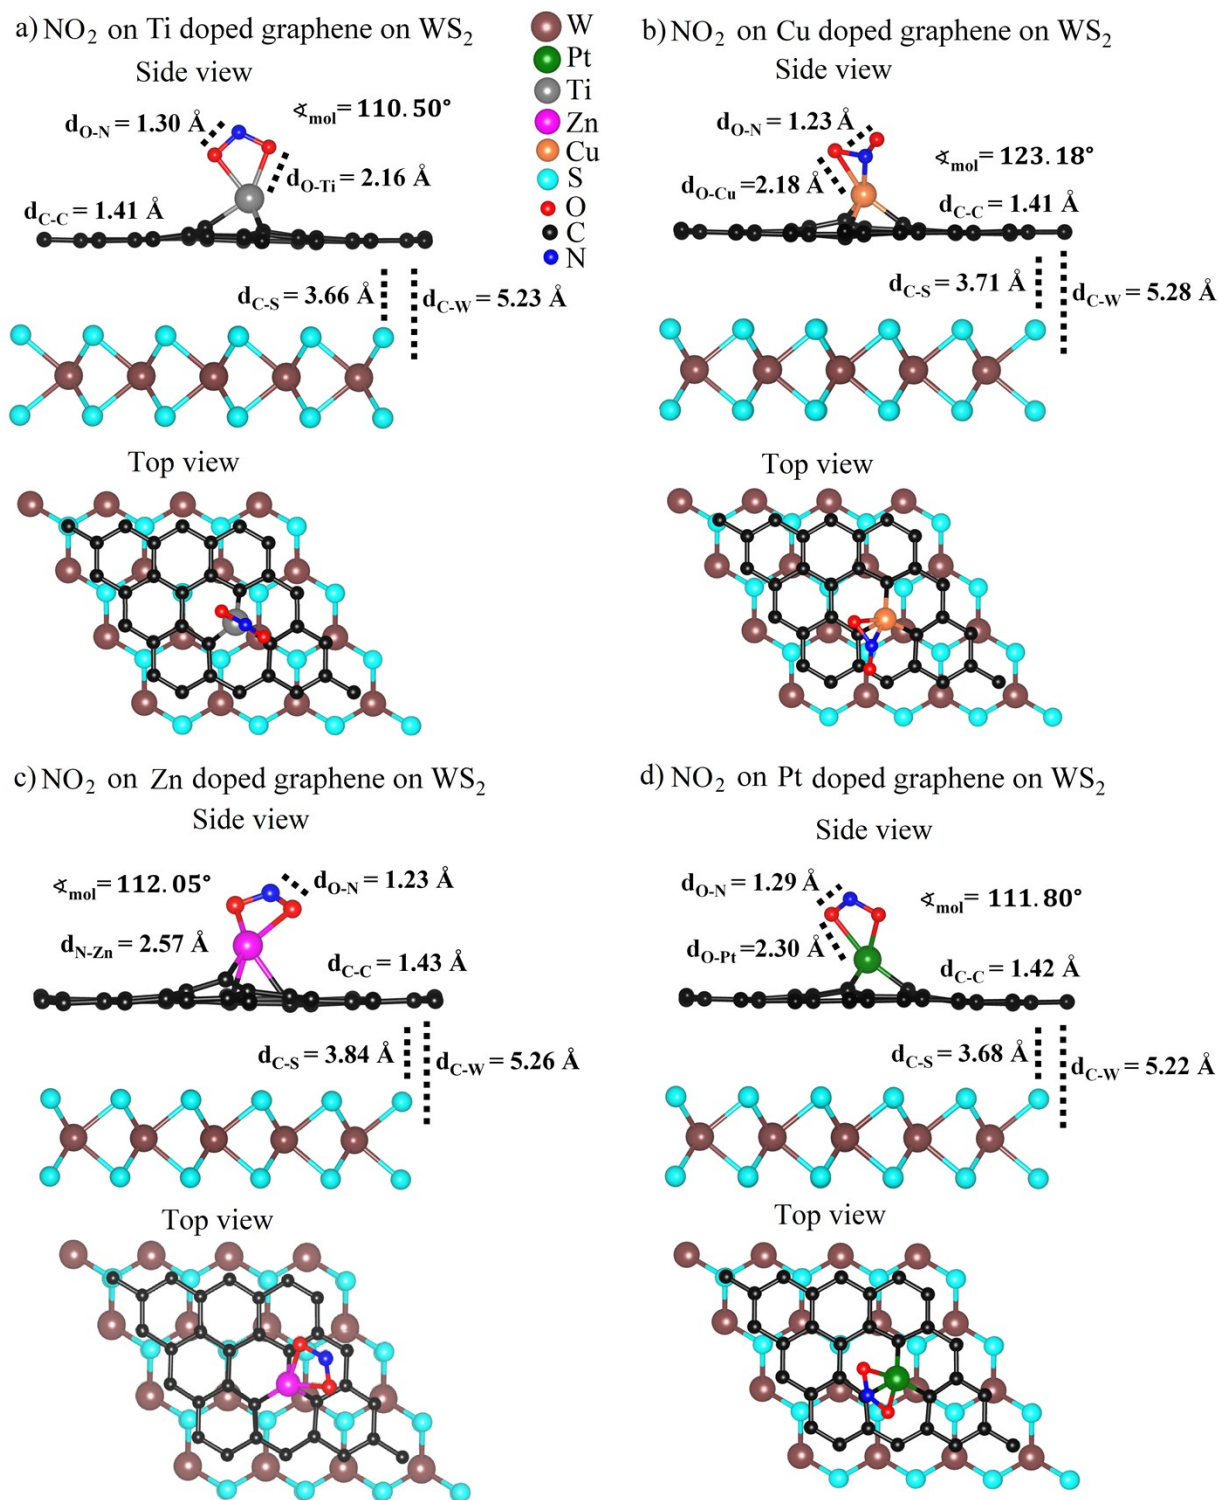

**Fig. S7.** Adsorption of NO<sub>2</sub> molecule on GSAC with: a) Ti, b) Cu, c) Zn, and d) Pt on WS<sub>2</sub> heterostructure, top and side views.



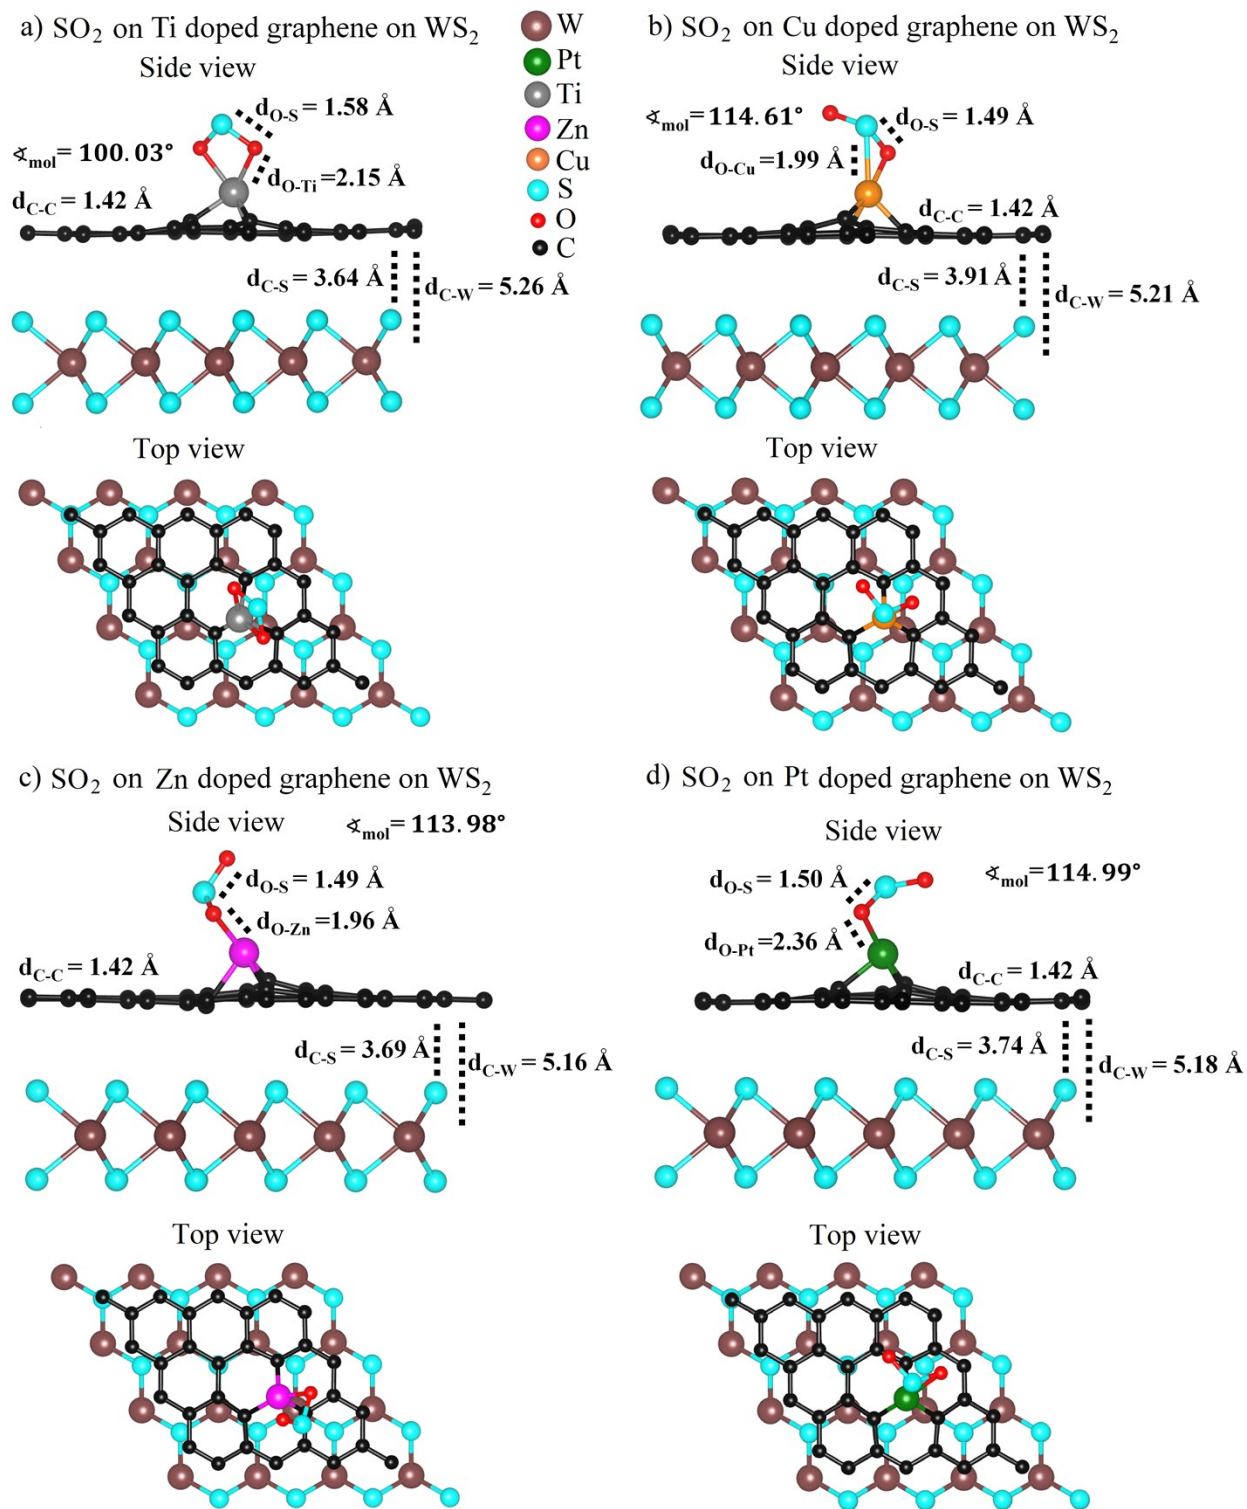

**Fig. S8.** Adsorption of SO<sub>2</sub> molecule on GSAC with: a) Ti, b) Cu, c) Zn, and d) Pt on WS<sub>2</sub> heterostructure, top and side views.

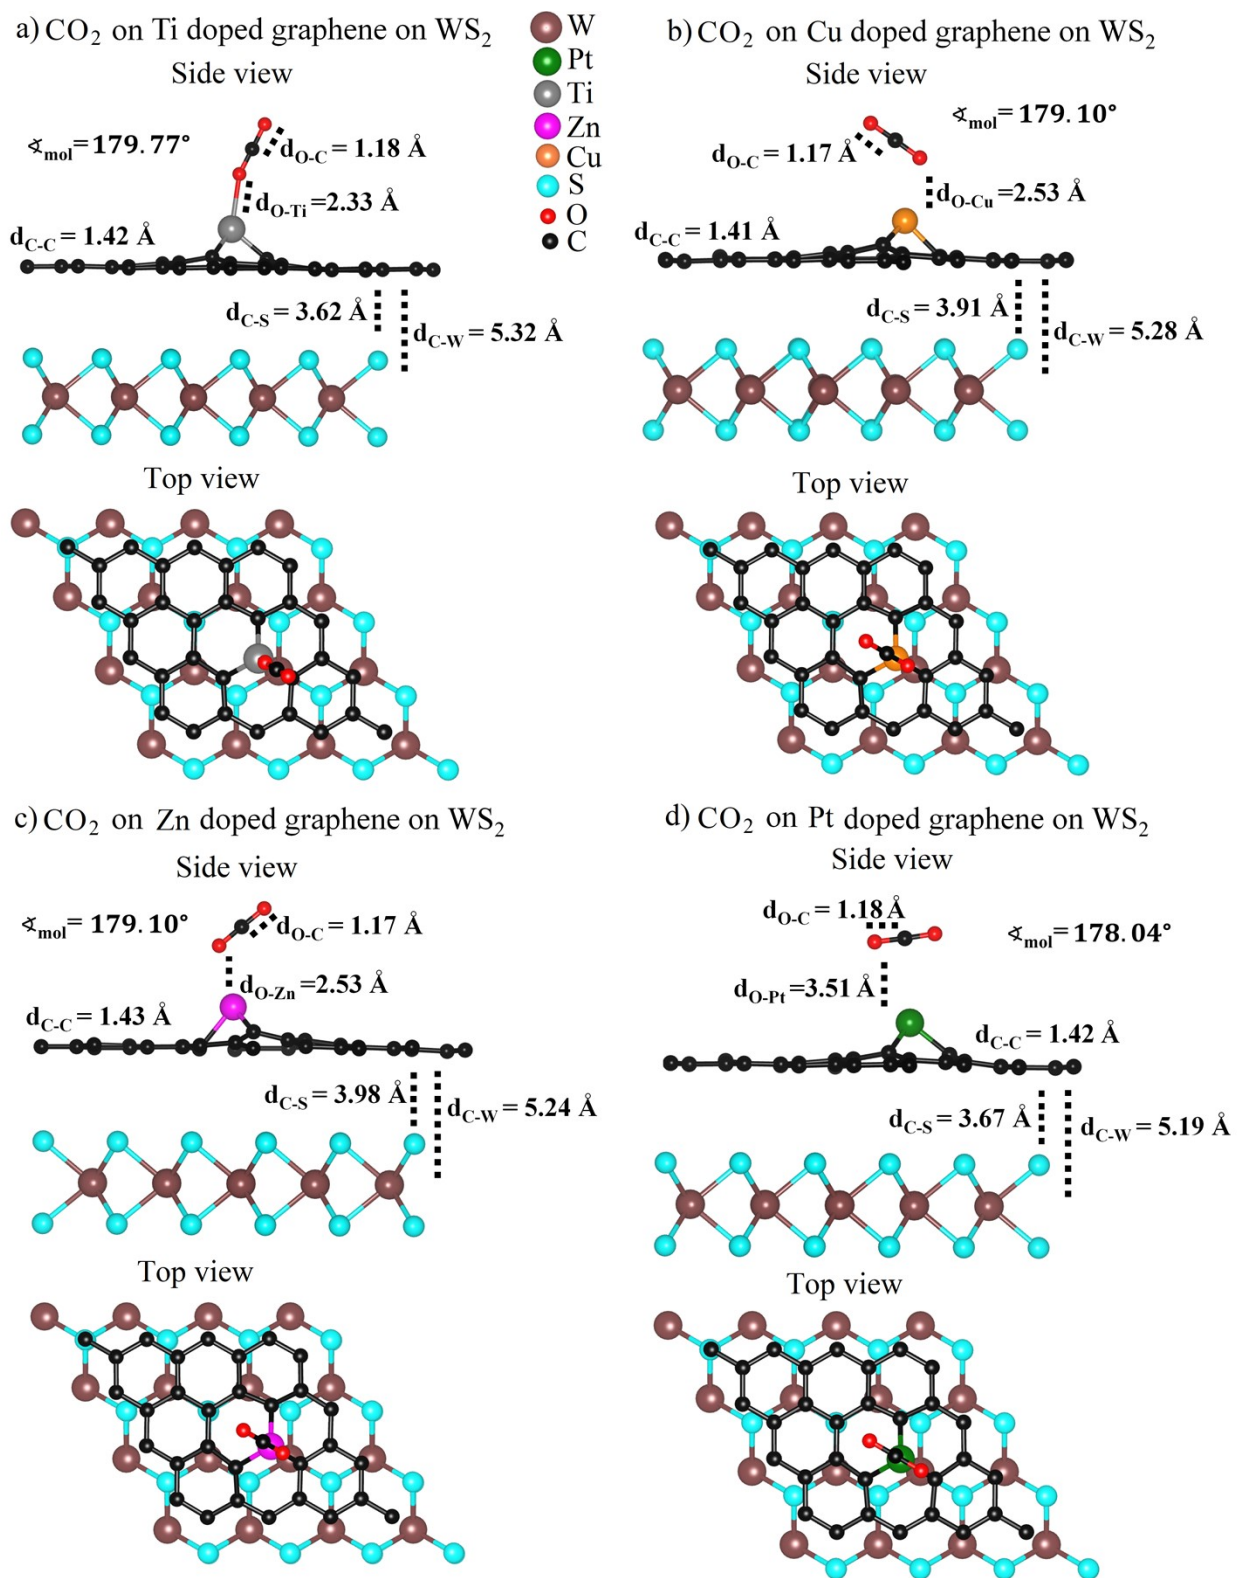

**Fig. S9.** Adsorption of CO<sub>2</sub> molecule on GSAC with a) Ti, b) Cu, c) Zn, and d) Pt on WS<sub>2</sub> heterostructure, top and side views.

Table 1S. Adsorption energy,  $E_{\text{ads}}$ , per supercell.

|                                               | Adsorption energy<br>(eV/supercell) |
|-----------------------------------------------|-------------------------------------|
| $\text{NO}_2/\text{G}/\text{MoS}_2$           | -0.32                               |
| $\text{NO}_2/\text{G}/\text{WS}_2$            | -0.31                               |
| $\text{NO}_2/\text{G}/\text{Ti}/\text{MoS}_2$ | -3.11                               |
| $\text{NO}_2/\text{G}/\text{Ti}/\text{WS}_2$  | -2.92                               |
| $\text{NO}_2/\text{G}/\text{Cu}/\text{MoS}_2$ | -2.61                               |
| $\text{NO}_2/\text{G}/\text{Cu}/\text{WS}_2$  | -2.22                               |
| $\text{NO}_2/\text{G}/\text{Zn}/\text{MoS}_2$ | -2.31                               |
| $\text{NO}_2/\text{G}/\text{Zn}/\text{WS}_2$  | -2.36                               |
| $\text{NO}_2/\text{G}/\text{Pt}/\text{MoS}_2$ | -2.32                               |
| $\text{NO}_2/\text{G}/\text{Pt}/\text{WS}_2$  | -2.36                               |
| $\text{SO}_2/\text{G}/\text{MoS}_2$           | -0.30                               |
| $\text{SO}_2/\text{G}/\text{WS}_2$            | -0.30                               |
| $\text{SO}_2/\text{G}/\text{Ti}/\text{MoS}_2$ | -1.64                               |
| $\text{SO}_2/\text{G}/\text{Ti}/\text{WS}_2$  | -1.64                               |
| $\text{SO}_2/\text{G}/\text{Cu}/\text{MoS}_2$ | -1.09                               |
| $\text{SO}_2/\text{G}/\text{Cu}/\text{WS}_2$  | -1.19                               |
| $\text{SO}_2/\text{G}/\text{Zn}/\text{MoS}_2$ | -0.91                               |
| $\text{SO}_2/\text{G}/\text{Zn}/\text{WS}_2$  | -1.74                               |
| $\text{SO}_2/\text{G}/\text{Pt}/\text{MoS}_2$ | -1.00                               |
| $\text{SO}_2/\text{G}/\text{Pt}/\text{WS}_2$  | -1.01                               |
| $\text{CO}_2/\text{G}/\text{MoS}_2$           | -0.20                               |
| $\text{CO}_2/\text{G}/\text{WS}_2$            | -0.19                               |

|                                        |       |
|----------------------------------------|-------|
| CO <sub>2</sub> /G:Ti/MoS <sub>2</sub> | -0.46 |
| CO <sub>2</sub> /G:Ti/WS <sub>2</sub>  | -0.47 |
| CO <sub>2</sub> /G:Cu/MoS <sub>2</sub> | -0.10 |
| CO <sub>2</sub> /G:Cu/WS <sub>2</sub>  | -0.17 |
| CO <sub>2</sub> /G:Zn/MoS <sub>2</sub> | -0.13 |
| CO <sub>2</sub> /G:Zn/WS <sub>2</sub>  | -0.27 |
| CO <sub>2</sub> /G:Pt/MoS <sub>2</sub> | -0.09 |
| CO <sub>2</sub> /G:Pt/WS <sub>2</sub>  | -0.09 |
